# Supplementary material for: The impact of repeated vaccination on influenza vaccine effectiveness: a systematic review and meta-analysis
Source: Springer Nature journal article supplement (doi:10.1186/s12916-018-1239-8), 2019-01-08

**Figure S1.** Results of the risk of bias assessment by category using the Newcastle-Ottawa Scale

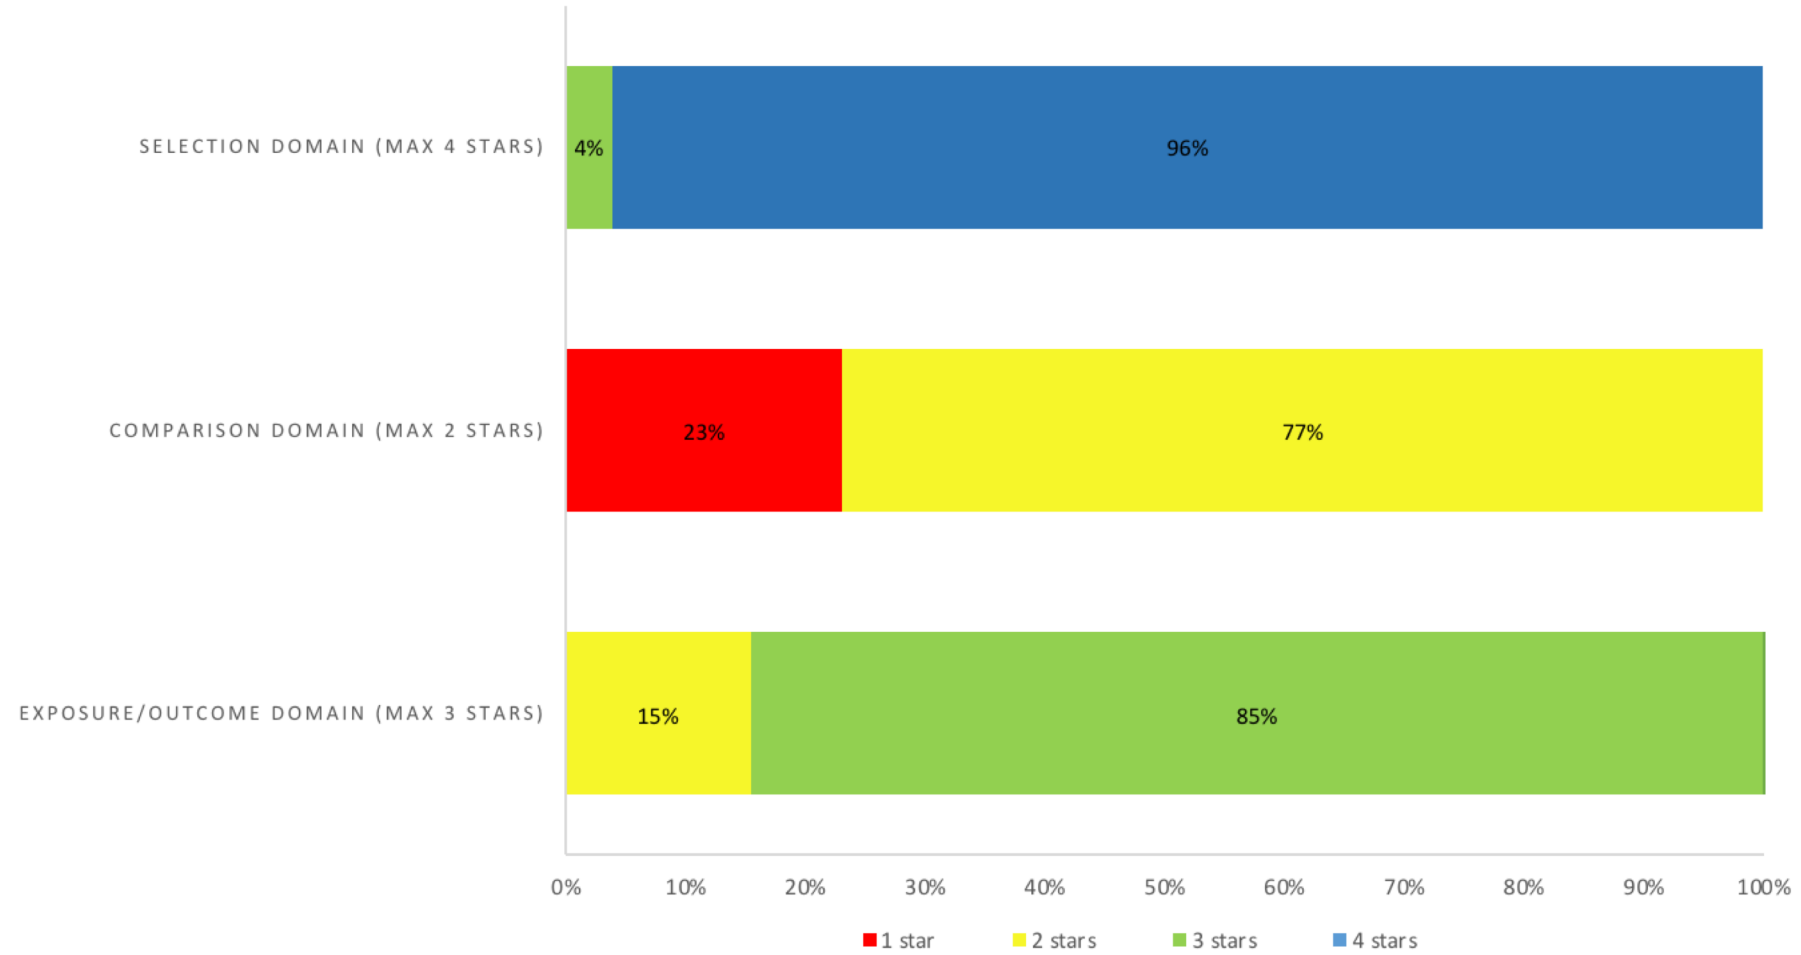

Supplement: MOESM3 [file 16390398]
